# Supplementary material for: Nuclear lamina strain states revealed by intermolecular force biosensor
Source: PubMed Central journal article supplement (PMC10313699; doi:10.1038/s41467-023-39563-6), 2023-06-30
Supplement: 41467_2023_39563_MOESM3_ESM.pdf [file 41467_2023_39563_MOESM3_ESM.pdf]

## Description of Additional Supplementary Files

**Supplementary Data 1:** Used primers of lamin A/C fragments
